# Supplementary material
Source: PubMed Central journal article supplement (PMC8380457)
Supplement: develop-148-199381-s1.pdf [file develop-148-199381-s1.pdf]

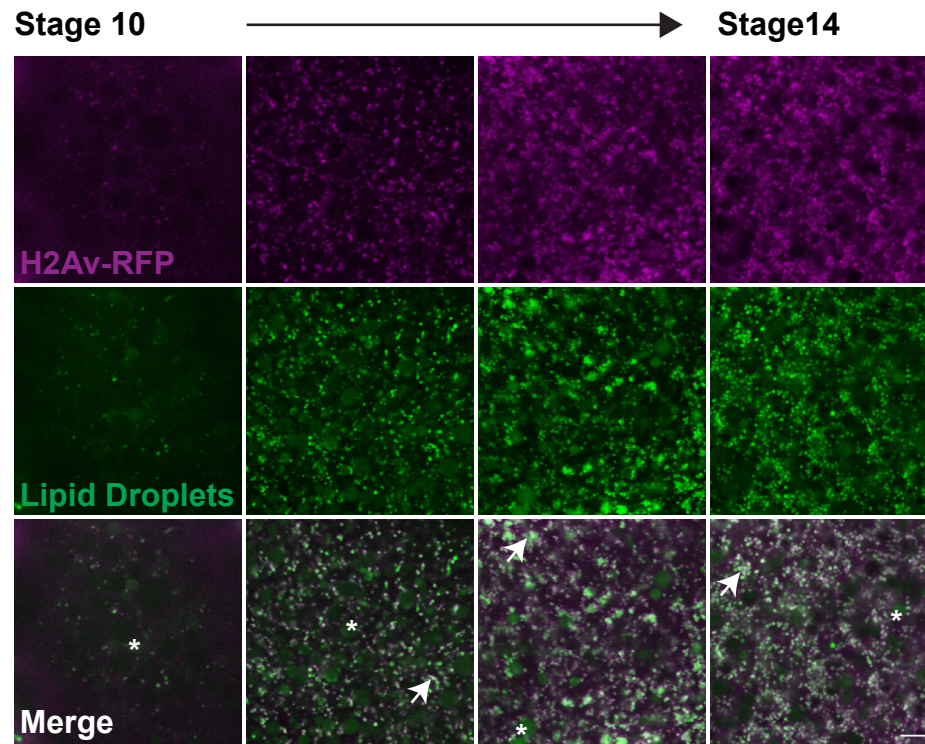

**Fig. S1. Ooplasmic H2Av is present on LDs.**

Labeled LDs (BODIPY, green) in ECs of flies expressing H2Av-RFP (magenta). Arrows: H2Av-LD colocalization. Yolk (large structures, asterisk) are visible due to autofluorescence. Scale bar: 10 $\mu$ m

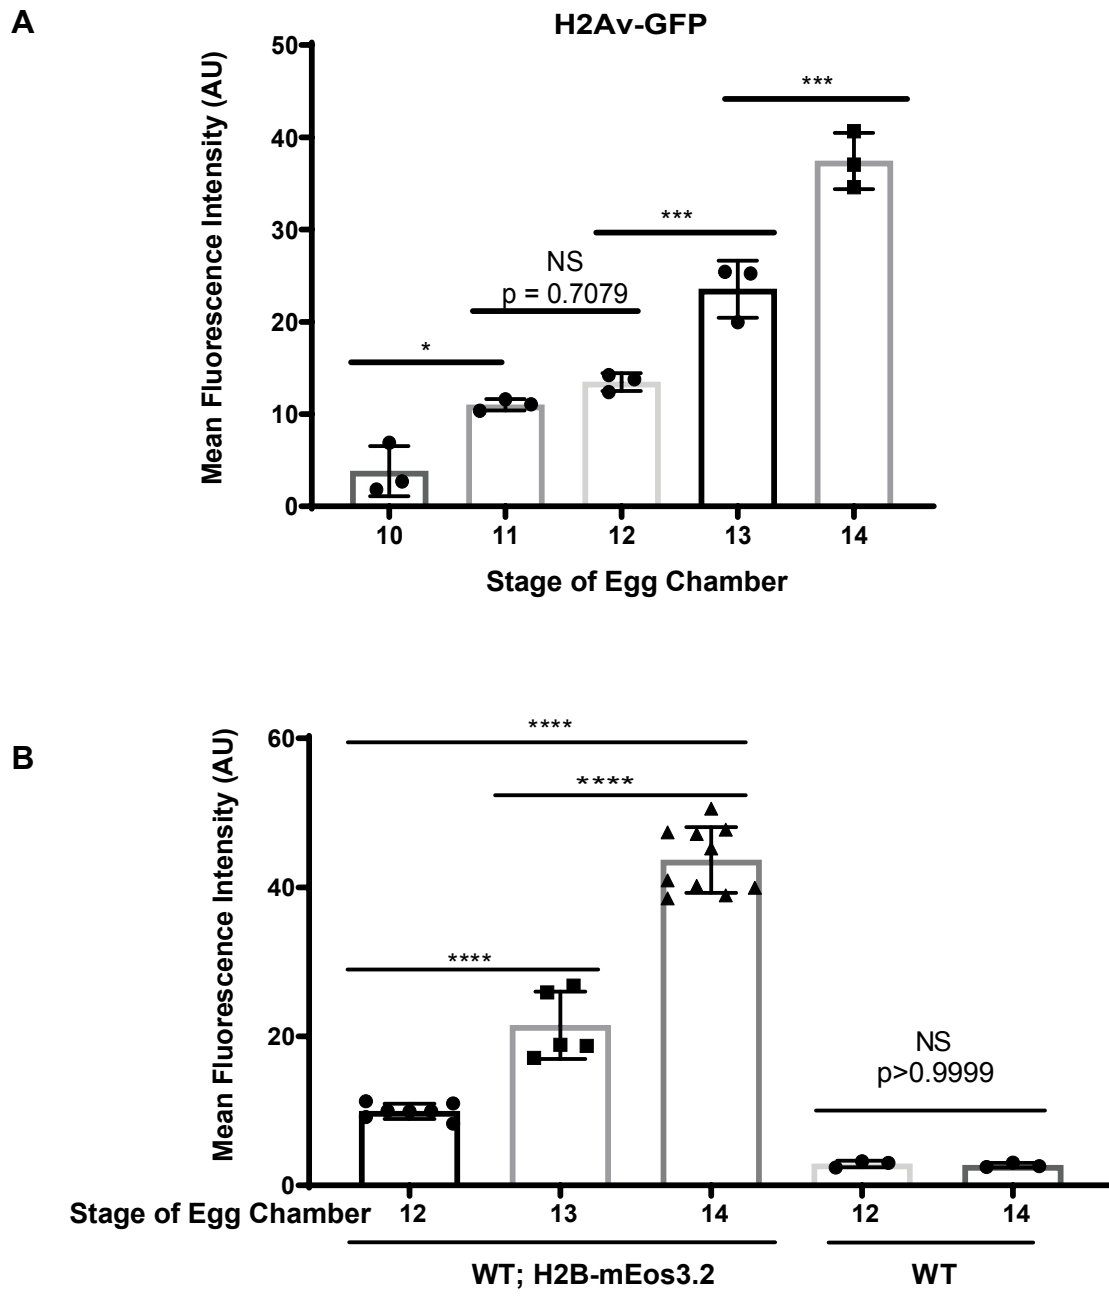

**Fig. S2. H2Av and H2B levels increase during oogenesis.**

(A) Quantitation of H2Av-GFP Mean Fluorescence Intensity (AU) in the ooplasm over developmental time.

S10 vs S11,  $p=0.0243$ ; S11 vs S12,  $p=0.7079$ ; S12 vs S13,  $p=0.0026$ ; S13 vs S14,  $p=0.0002$ ;  $n=3$ . (B)

Quantitation of H2B-mEos3.2 Mean Fluorescence Intensity (AU) in the ooplasm over developmental time.

Intensity did not change significantly in ECs expressing no fluorescently-tagged H2B. S12 vs S13,

$p<0.001$ ; S13 vs S14,  $p<0.001$ ; S12 vs S14,  $p<0.001$ ; WT S12 vs WT S14,  $p>0.9999$ .  $n=3-10$ . Statistical

test: a one-way ANOVA followed by Tukey's test

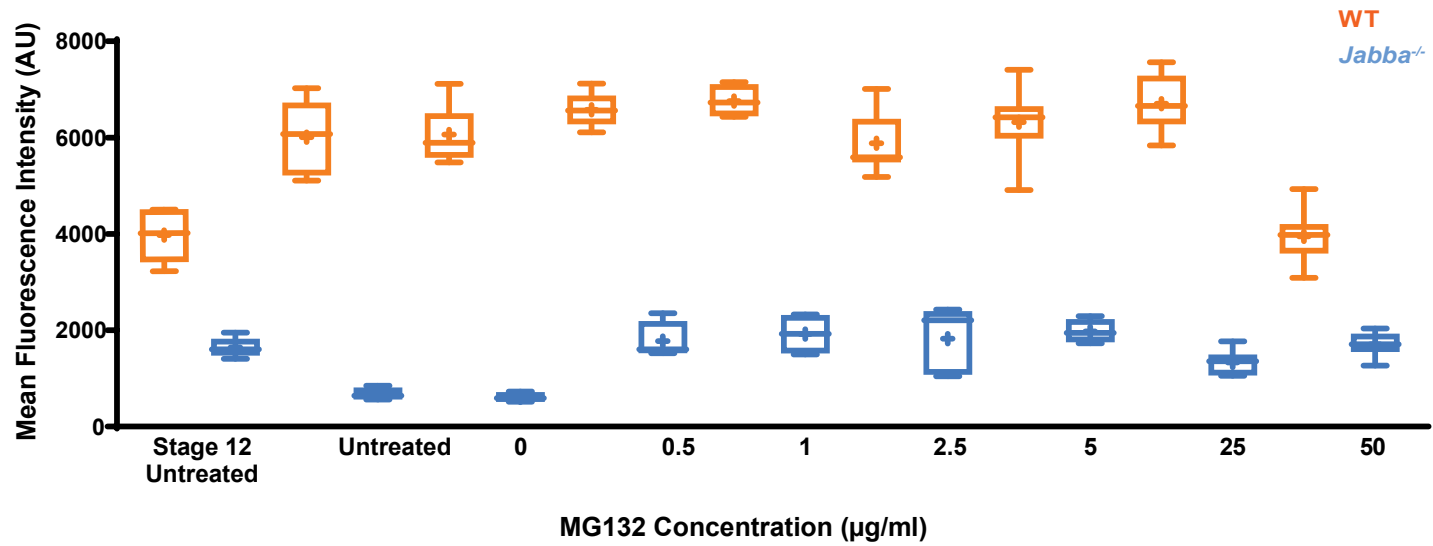

**Fig. S3. H2Av degradation in the absence of Jabba**

Mean fluorescence intensity (AU) in S14 WT (orange) or *Jabba*<sup>-/-</sup> (blue) ECs after IVEM. Length of box plot: 25<sup>th</sup> and 75<sup>th</sup> percentile. Line: median, cross: mean. Stage 12 Untreated = S12 ECs analyzed immediately after dissection; Untreated = cultured in IVEM media. Fig. 5B contains a subset of these data. n=4-8

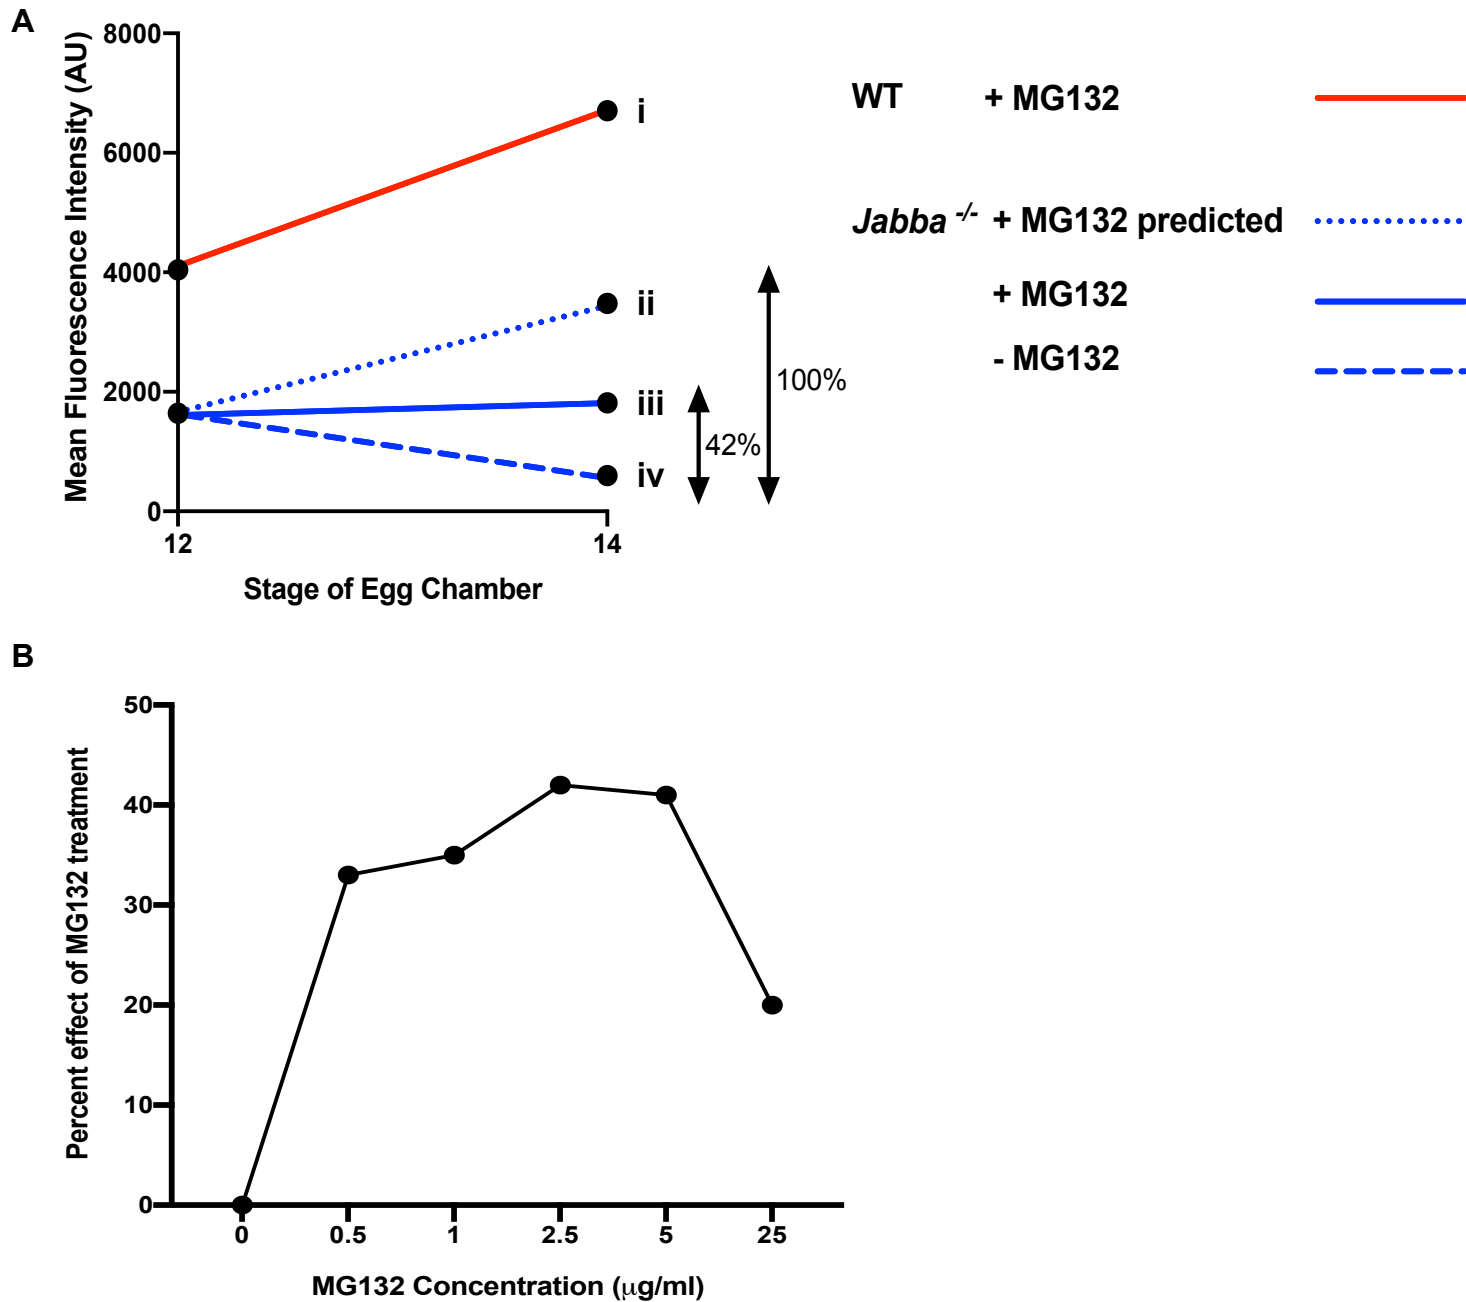

**Fig. S4. Quantitative estimate of the drug effect on proteasome inhibition.** (A) Analysis of the quantitative estimate of the effect on proteasome inhibition for 2.5 µg/ml of MG132. From S12 to S14, WT H2Av levels increase by 1839 AU (i, red line). Upon MG132 treatment, a similar rise in *Jabba*<sup>-/-</sup> ECs would lead to 3481 AU (ii, 1642 AU in S12 + 1839 AU; blue, dotted line). With no drug, levels in *Jabba*<sup>-/-</sup> fall to 606 AU (iv; blue, dashed line). The observed value (iii) upon MG132 treatment represents 42% of the maximal possible effect (blue, solid line). (B) Estimated drug effect on proteasome inhibition for MG132 concentrations.

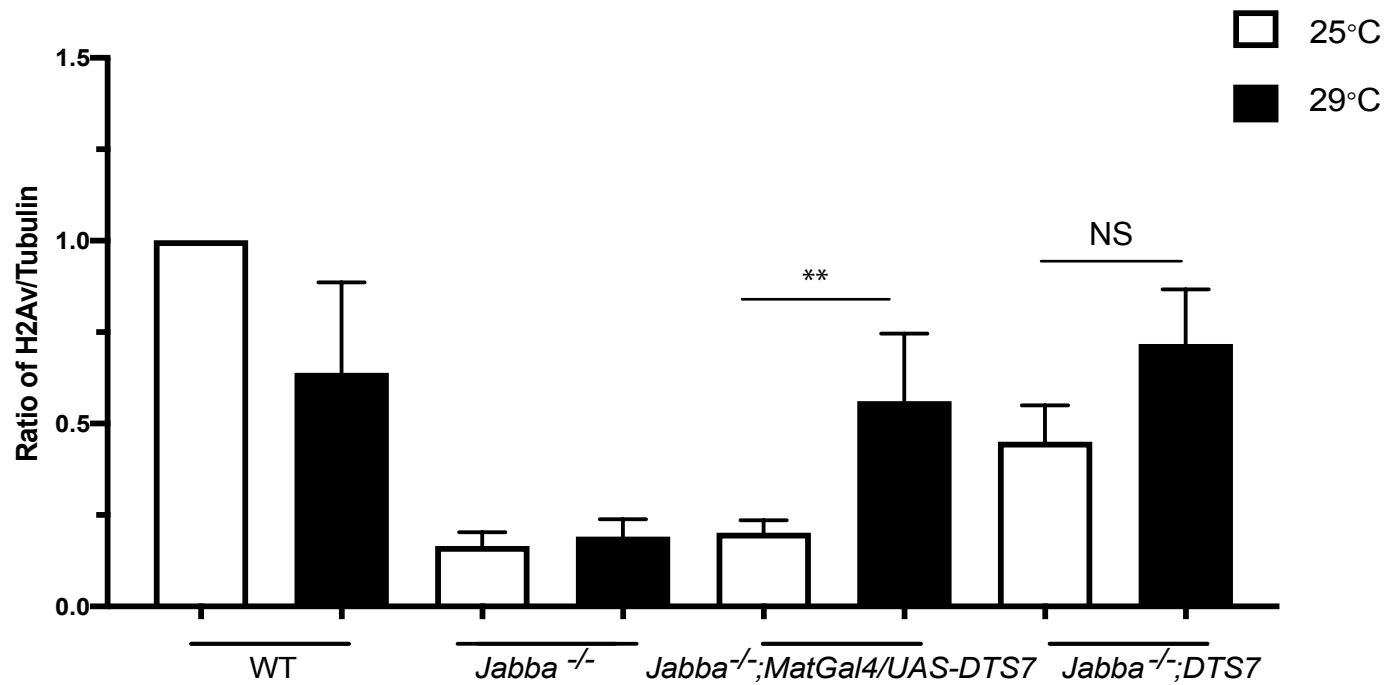

**Fig. S5. Quantitation of H2Av levels upon genetic proteasome inhibition.** We measured H2Av and tubulin levels (by Western) in S14 oocytes at 25°C and 29°C. H2Av/tubulin ratio was normalized to WT at 25°C. ECs from *Jabba*<sup>-/-</sup>; *MatGAL4/UAS-DTS7* and *Jabba*<sup>-/-</sup>; *DTS7* flies kept at 29°C have higher H2Av levels compared to controls. Black: Incubated at 29°C, White: Incubated at 25°C. *Jabba*<sup>-/-</sup>; *MatGAL4/UAS-DTS7* 25°C vs 29°C, p=0.0073; *Jabba*<sup>-/-</sup>; *DTS7* 25°C vs 29°C, p=0.1784; a one-way ANOVA followed by Tukey's test. n=5.

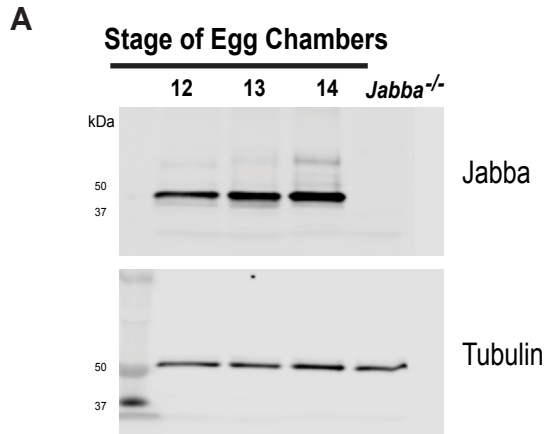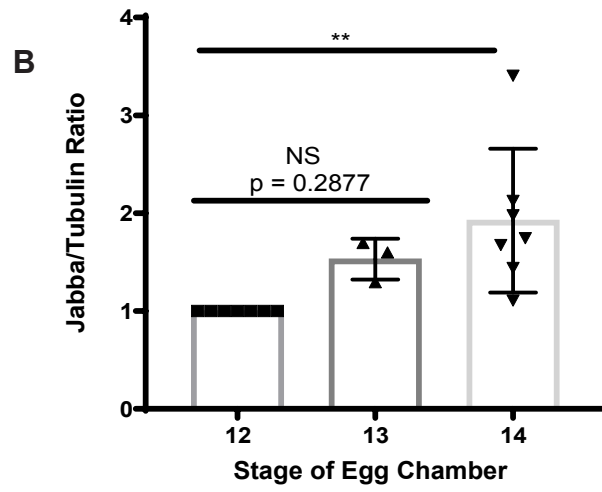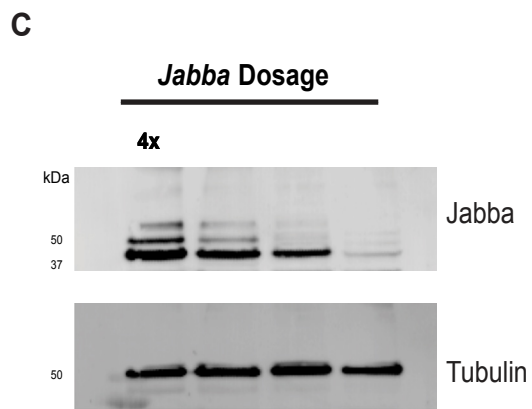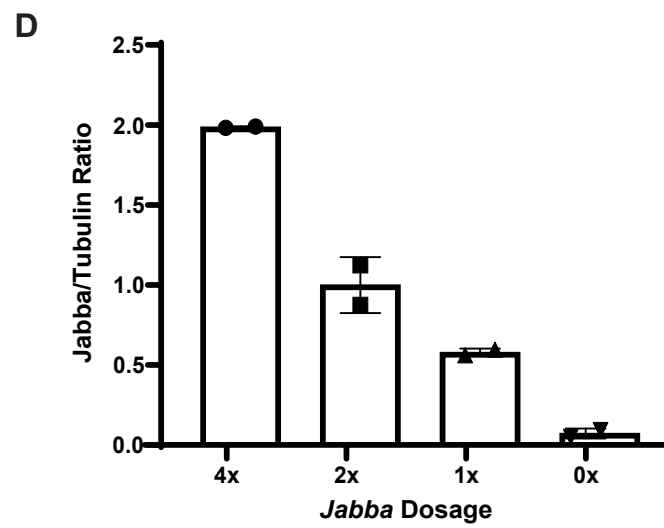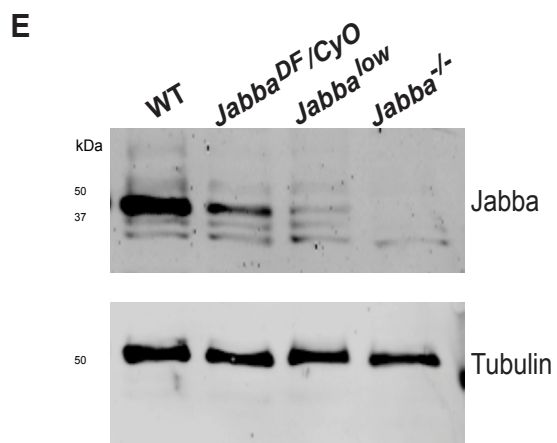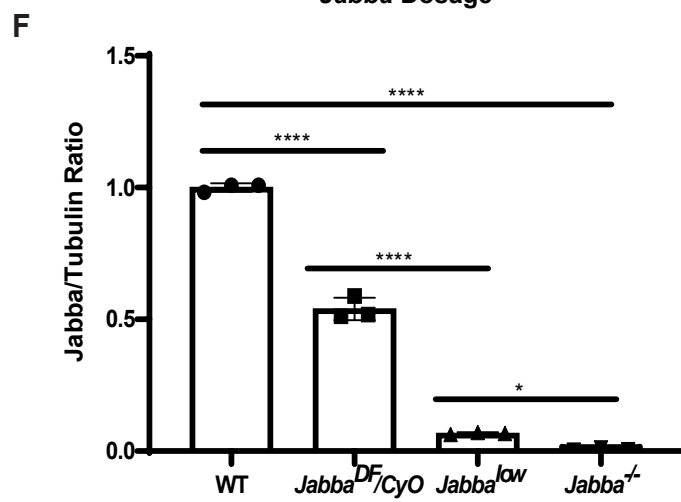

**Fig. S6. Analysis of Jabba levels during oogenesis and embryogenesis**

(A) Western analysis of Jabba levels in ECs from S12-S14. (B) Quantitation of (A) expressed as the Jabba/tubulin ratio normalized to S12. S12 vs S13,  $p=0.2877$ ; S12 vs S14,  $p=0.0085$ .  $n=3-7$ . (C) Jabba expression scales with *Jabba* dosage. Western analysis of Jabba levels in S14 ECs of flies expressing varying *Jabba* dosages. (D) Quantitation of (C) expressed as the Jabba/tubulin ratio normalized to  $2x$  *Jabba*.  $n=2$ . (E) Anti-Jabba Western of embryos from wild-type and various *Jabba* genotypes. *Jabba<sup>low</sup>* expresses low levels of wild-type *Jabba*. (F) Quantitation of (E) expressed as the Jabba/tubulin ratio normalized to wild type. In *Jabba<sup>DF</sup>/CyO*, Jabba is detected at roughly half the wild type level. Jabba protein is decreased in *Jabba<sup>low</sup>*.  $n=3$ . WT vs *Jabba<sup>-/-</sup>*,  $p<0.0001$ ; WT vs *Jabba<sup>DF</sup>/CyO*,  $p<0.0001$ ; *Jabba<sup>DF</sup>/CyO* vs *Jabba<sup>low</sup>*,  $p<0.0001$ ; *Jabba<sup>low</sup>* vs *Jabba<sup>-/-</sup>*,  $p=0.0485$ .  $n=3$ . Statistical test: one-way ANOVA followed by Tukey's test.



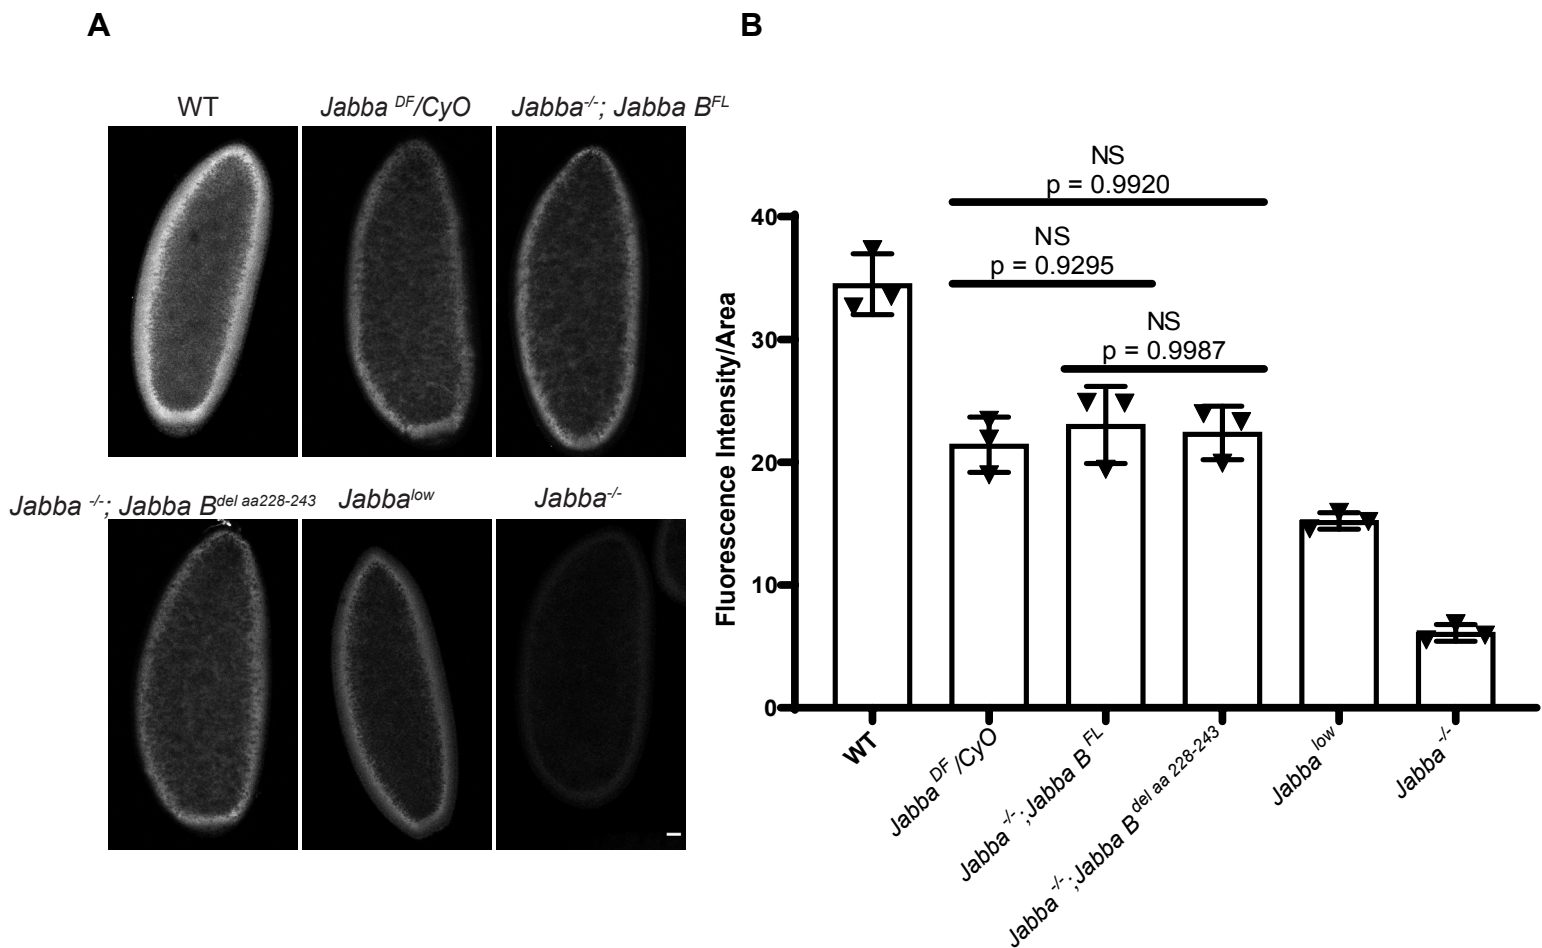

**Fig. S7. *Jabba B<sup>FL</sup>* and *Jabba B<sup>del aa228-243</sup>* expression levels are comparable to that of one copy of *Jabba*.**

(A) Anti-Jabba (white) immunostaining of embryos of *Jabba* genotypes. Scale bar: 25µm. (B) Quantitation of Fluorescence Intensity/Area for (A). The Fluorescence Intensity/Area for *Jabba<sup>-/-</sup>; Jabba B<sup>FL</sup>* and *Jabba<sup>-/-</sup>; Jabba B<sup>del aa 228-243</sup>* embryos are comparable to *Jabba<sup>DF</sup>/CyO* embryos (expressing 1x *Jabba*). WT vs *Jabba<sup>-/-</sup>; Jabba B<sup>FL</sup>*, p=0.0003; *Jabba<sup>DF</sup>/CyO* vs *Jabba<sup>-/-</sup>; Jabba B<sup>FL</sup>*, p=0.9295; *Jabba<sup>DF</sup>/CyO* vs *Jabba<sup>-/-</sup>; Jabba B<sup>del aa228-243</sup>*, p=0.9920; *Jabba<sup>-/-</sup>; Jabba B<sup>FL</sup>* vs *Jabba<sup>-/-</sup>; Jabba B<sup>del aa228-243</sup>*, p=0.9987; WT vs *Jabba<sup>DF</sup>/CyO*, p<0.0001; Statistical test: one-way ANOVA followed by Tukey's test. n=3.

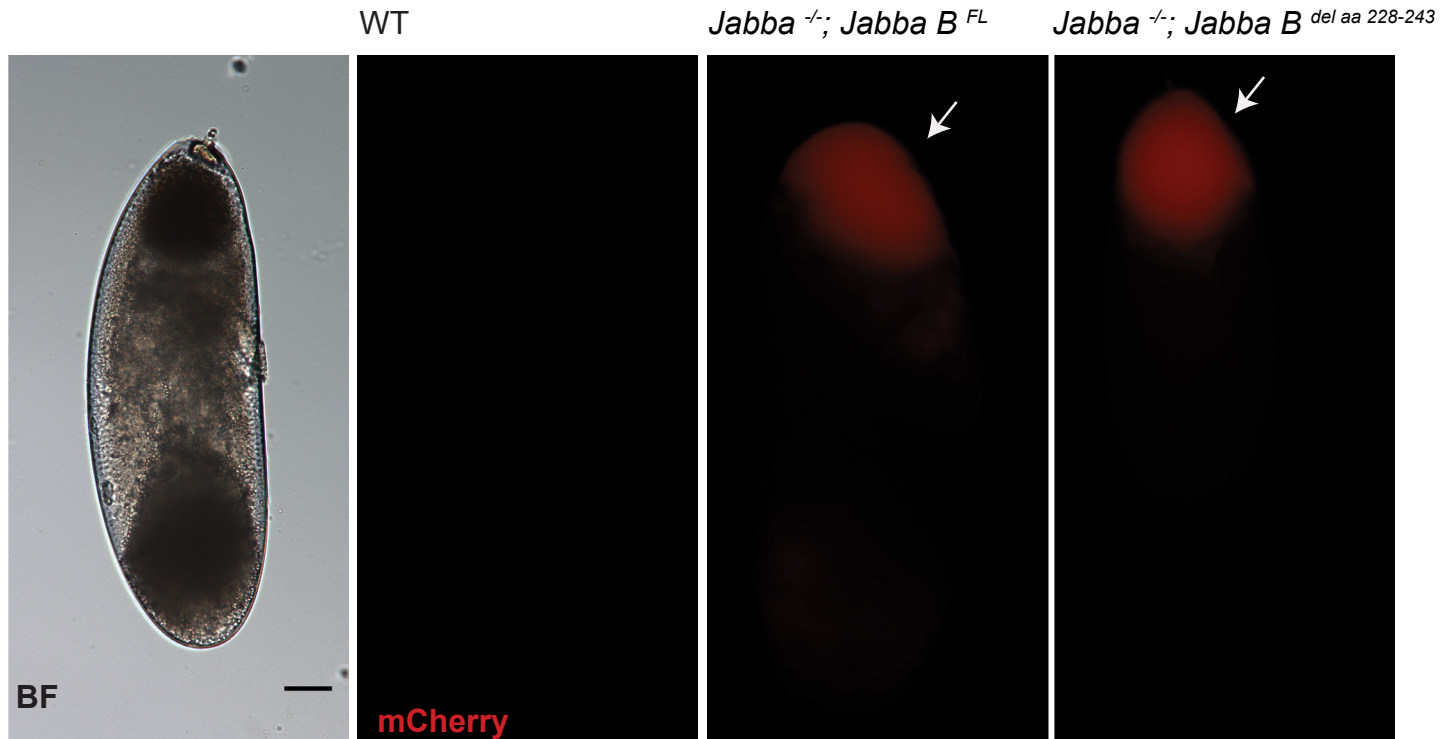

**Fig. S8. *Jabba*<sup>B<sup>FL</sup></sup> and *Jabba*<sup>B<sup>del aa 228-243</sup></sup> can associate with LDs.**

mCherry (red) is detected in LD layers (arrow) of centrifuged embryos expressing the *Jabba* transgenes, but not in wild-type embryos. BF: Brightfield image of centrifuged embryo. Scale bar: 50 $\mu$ m.

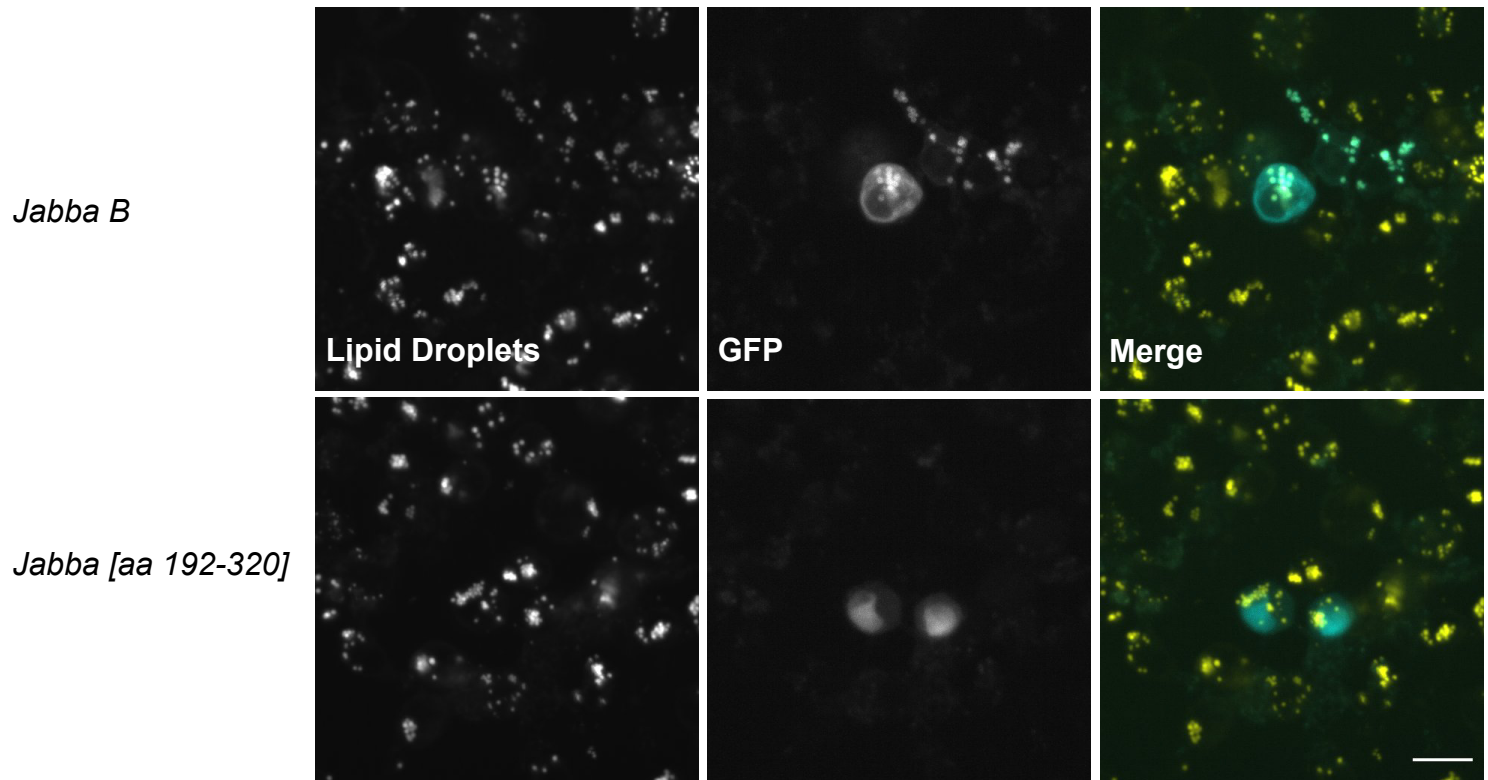

**Fig. S9. Localization of Jabba [aa192-321] in S2R+ cells.**

Jabba B (cyan, top) is present on LDs (yellow). Jabba [aa192-321] (cyan, bottom) is absent from LDs.

LDs are stained with C12 BODIPY558/568. Scale bar: 10 $\mu$ m

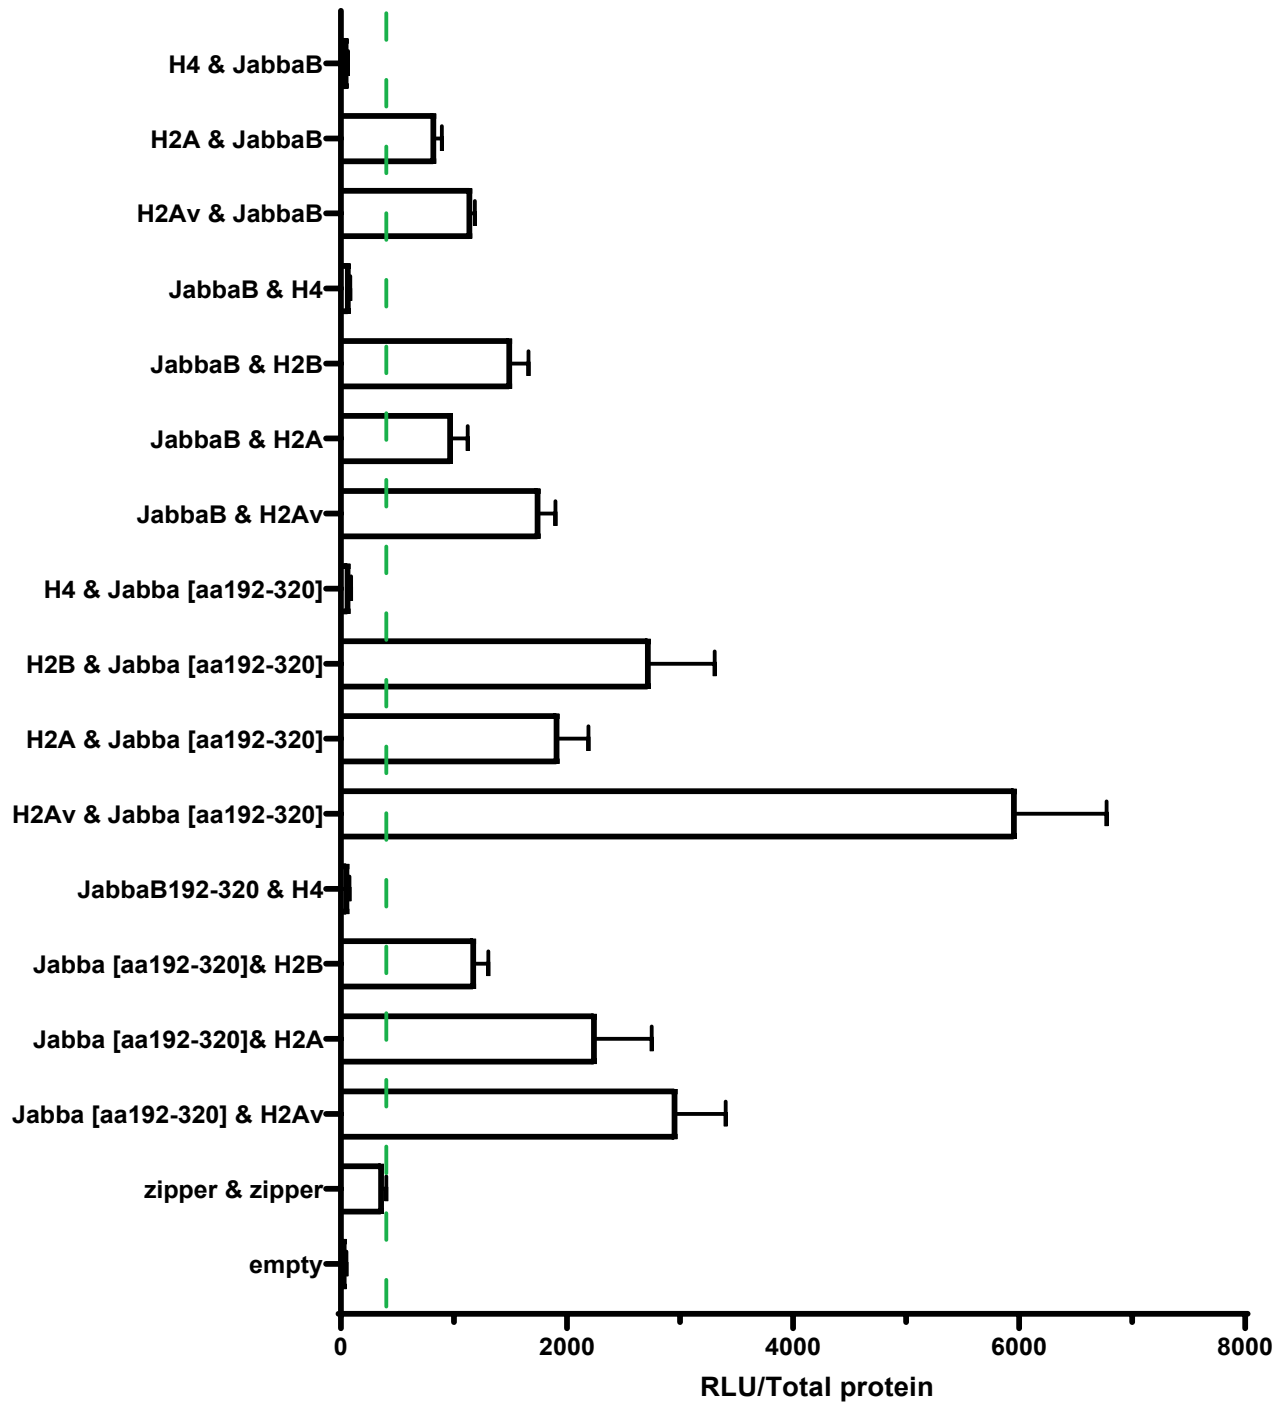

**Fig. S10. Split luciferase complementation assay showing results for the indicated proteins.**

Luciferase complementation readings are expressed as relative light units ( RLU) per  $\mu\text{g}$  total protein.

Green line: threshold for positive interactions. Fig. 8B contains a subset of these data.  $n=3$ . Data are mean $\pm$ s.d.
